# Supplementary material for: The evolution of silicon transporters in diatoms
Source: PubMed Central journal article supplement — J Phycol. 2016 Aug 31;52(5):716–31. doi: 10.1111/jpy.12441 (PMC5129515; doi:10.1111/jpy.12441), 2016-08-31
Supplement: JPY-52-716-s002.pdf [file JPY-52-716-s002.pdf]

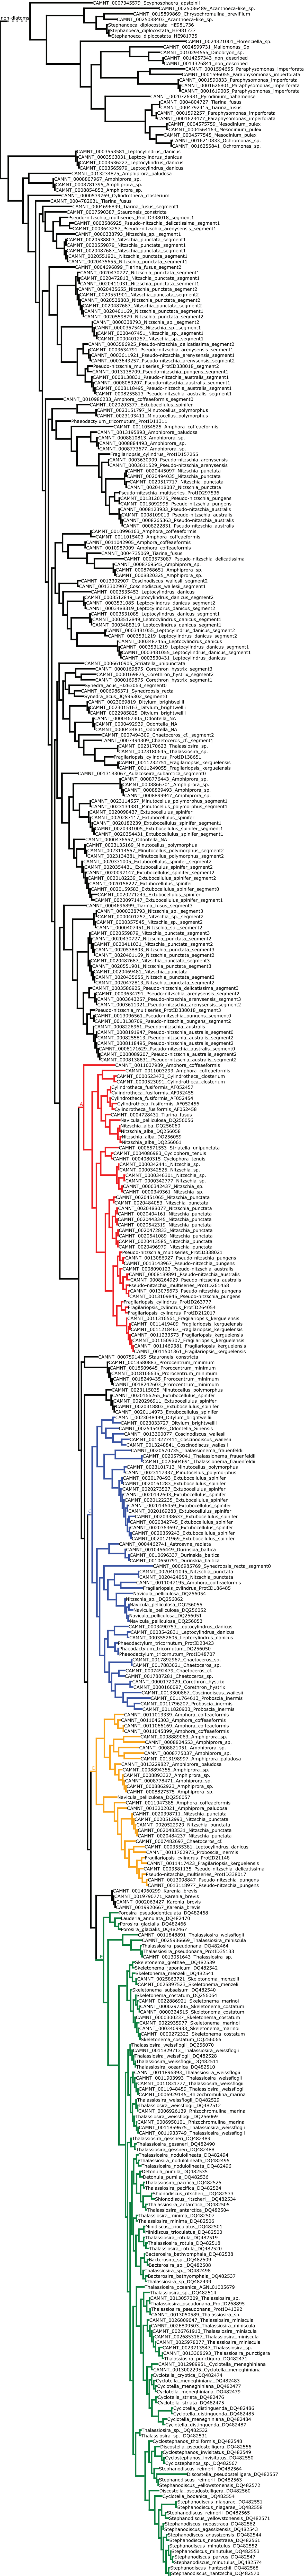

Figure S2. Phylogenetic tree of SIT proteins, as in Figure 2, displaying all individual branches and all sequences labeled by genus, species, and their sequence identifier (NCBI accession number, JGI protein ID, or MMETSP sequence ID). Branches are color coded by clade assignment (black = non-diatom outgroup and clade B, red = clade A, blue = clade C, orange = clade D, green = clade E).
