# Supplementary material for: The evolution of silicon transporters in diatoms
Source: PubMed Central journal article supplement — J Phycol. 2016 Aug 31;52(5):716–31. doi: 10.1111/jpy.12441 (PMC5129515; doi:10.1111/jpy.12441), 2016-08-31
Supplement: JPY-52-716-s004.pdf [file JPY-52-716-s004.pdf]

Figure S4

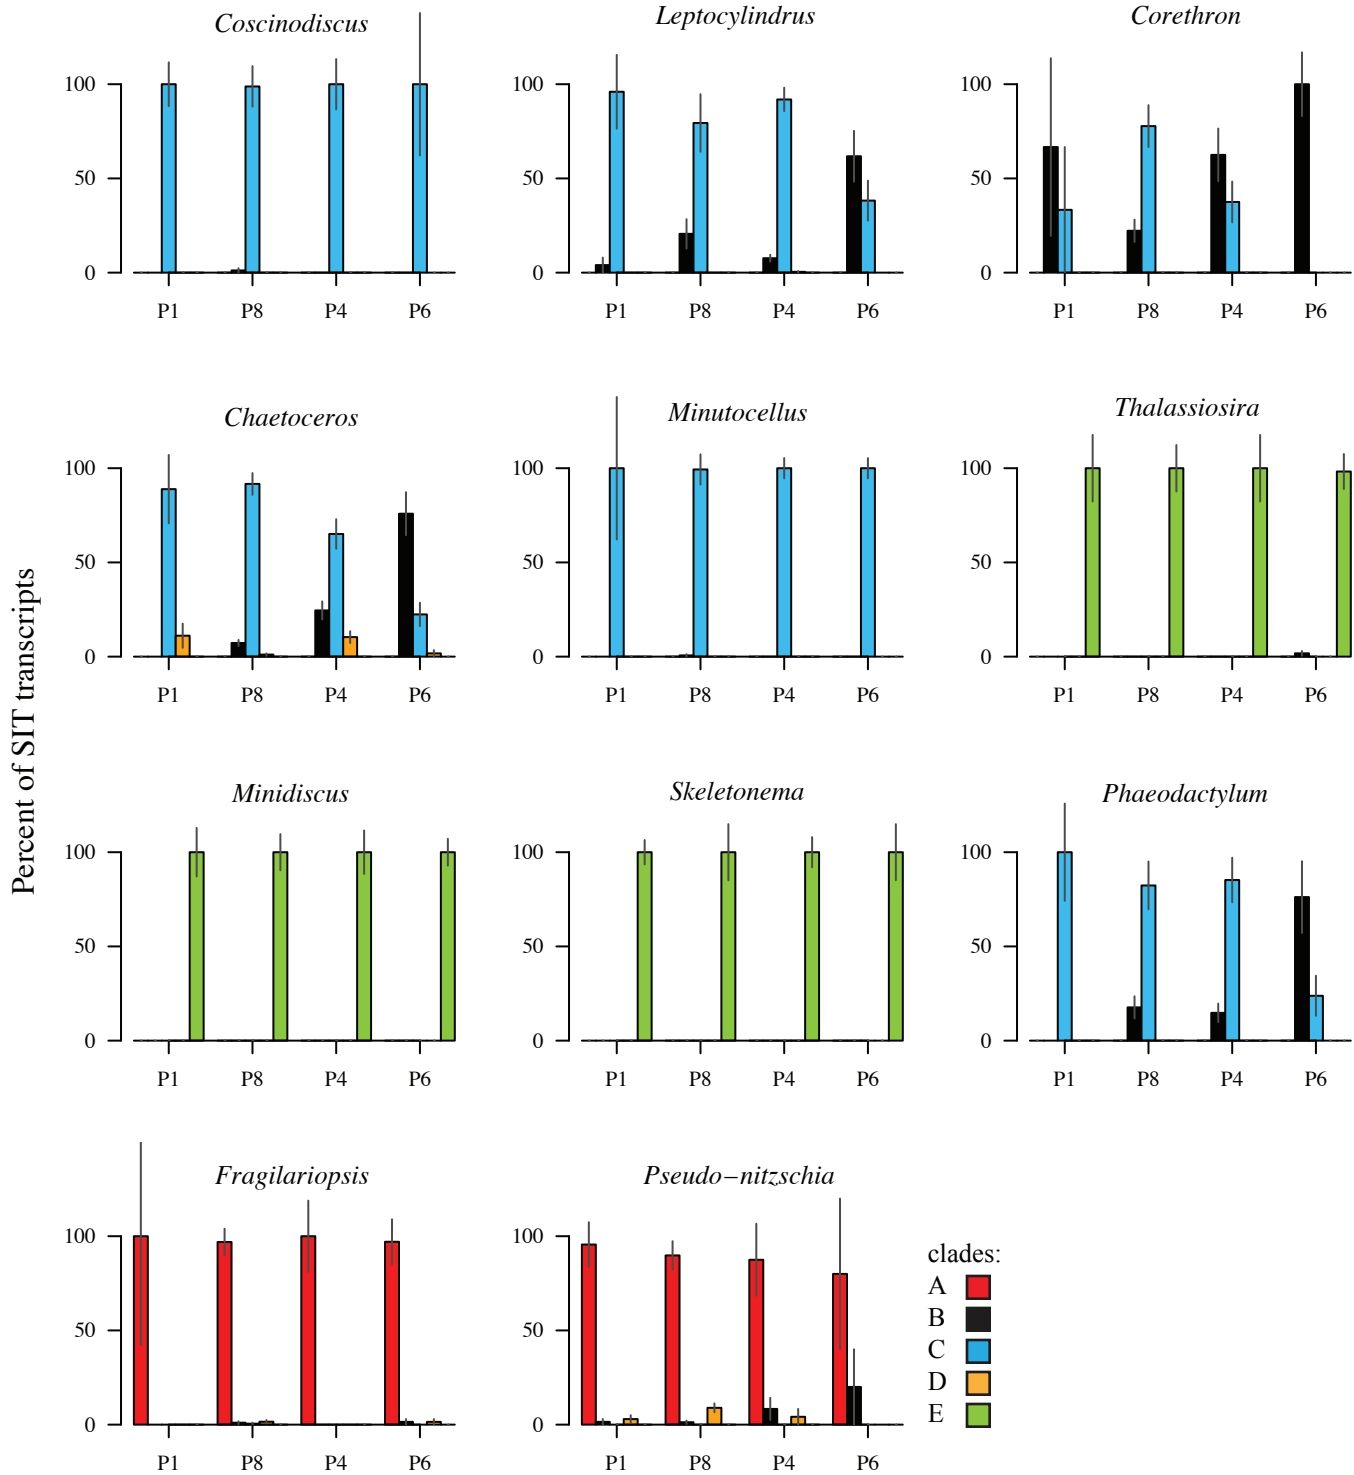

Figure S4. Percentage of SIT clades transcribed by genera with more than 100 total sequences detected at four stations along the Line P transect. Error bars indicate the uncertainty due to the number of transcripts observed (square root of the number of counts). Counts from replicate samples were combined to calculate percentages in order to reduce the counting uncertainty associated with genus-level classification of transcript abundance. Stations are displayed along the x-axis in order of the concentration of silicic acid measured in the seawater at each location.
